# Supplementary material for: Hepcidin deficiency impairs hippocampal neurogenesis and mediates brain atrophy and memory decline in mice
Source: Springer Nature journal article supplement (doi:10.1186/s12974-023-03008-0), 2024-01-09
Supplement: MOESM1 [file 12974_2023_3008_MOESM1_ESM.pdf]

## Supplementary tables and figures

**Table S1.** Primer sequences for genotyping.

| Primers                                        | Sequences (5'-3')        |
|------------------------------------------------|--------------------------|
| <i>Hamp</i> <sup>fl<sup>ox</sup></sup> forward | GTAGGGTCTGATAAGTGAAGCCAG |
| <i>Hamp</i> <sup>fl<sup>ox</sup></sup> reverse | AGCACAAAGGCTTATAGCACATTC |
| GFAP-Cre forward                               | TAGCCCACTCCTTCATAAAGCCCT |
| GFAP-Cre reverse                               | GCTAAGTGCCTTCTCTACACC    |
| Nestin-Cre forward                             | CCTTCCTGAAGCAGTAGAGCA    |
| Nestin-Cre reverse                             | GCCTTATTGTGGAAGGACTG     |

**Table S2.** Primer sequences for qRT-PCR.

| Genes                          | Forward (5'-3')         | Reverse (5'-3')         |
|--------------------------------|-------------------------|-------------------------|
| <i>GAPDH</i>                   | TGACTTCAACAGCGACACCCA   | CACCCTGTTGCTGTAGCCAAA   |
| <i>Hamp</i>                    | CTGAGCAGCACACCTATCTC    | TGGCTCTAGGCTATGTTTGC    |
| <i>TNF-<math>\alpha</math></i> | CACCATGAGCACAGAAAGCA    | TAGACAGAAGAGCGTGGTGG    |
| <i>IL-6</i>                    | CTGCAAGAGACTTCCATCCAG   | AGTGGTATAGACAGGTCTGTTGG |
| <i>BDNF</i>                    | CTGTATCAAAAGGCCAACTGAA  | GTGTCTATCCTTATGAATCGCCA |
| <i>NGF</i>                     | ACTGGACTAAACTTCAGCATTCC | GGGCAGCTATT GGTGCAGTA   |

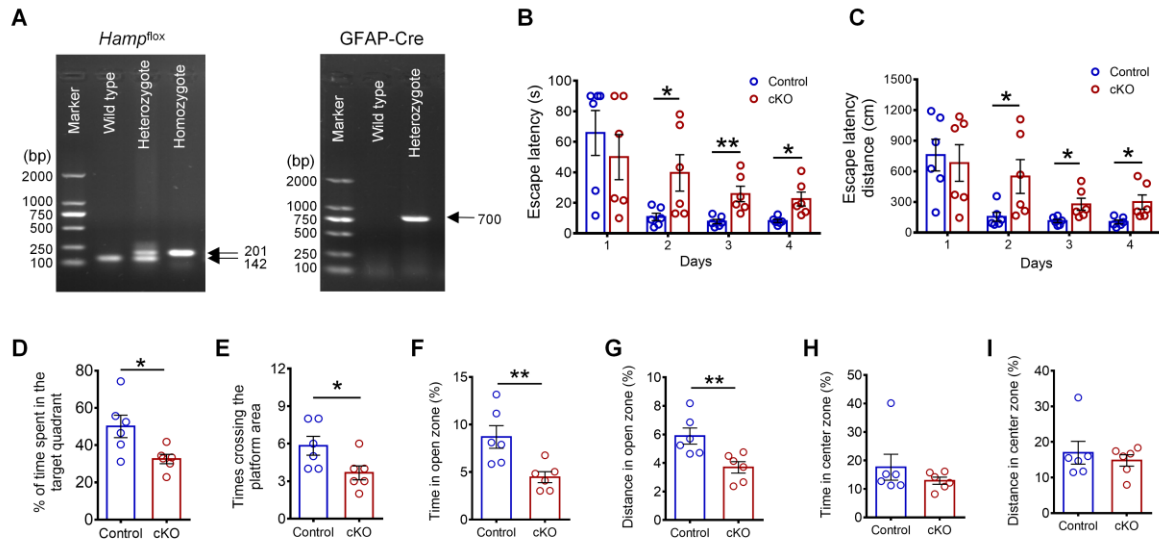

**Figure S1. Genotyping and behavioral tests of *Hamp<sup>GFAP</sup>* cKO and control mice.** **A** PCR amplification for identifying the bands of *Hamp<sup>lox/lox</sup>* (homozygote: one band at 201 bp; heterozygote: two bands at 201 bp and 142 bp; wildtype allele: one band at 142 bp) and GFAP-Cre (with cre: 700 bp; wildtype: no band). **B-E** In the Morris water maze test, the escape latency (**B**) and distance (**C**) during the training stage, and the percentage of time spent in the target quadrant (**D**) and number of times crossing the platform (**E**) of the 6-month-old *Hamp<sup>GFAP</sup>* cKO and control mice were analyzed. **F-I** In the elevated plus maze test, the percentages of time (**F**) and distance (**G**) spent in the open zone, and the percentages of time (**H**) and distance (**I**) in the center area of the 3-month-old *Hamp<sup>GFAP</sup>* cKO and control mice were analyzed. Data were expressed as mean  $\pm$  SEM,  $n = 6$  per group. \* $p < 0.05$  and \*\* $p < 0.01$ .

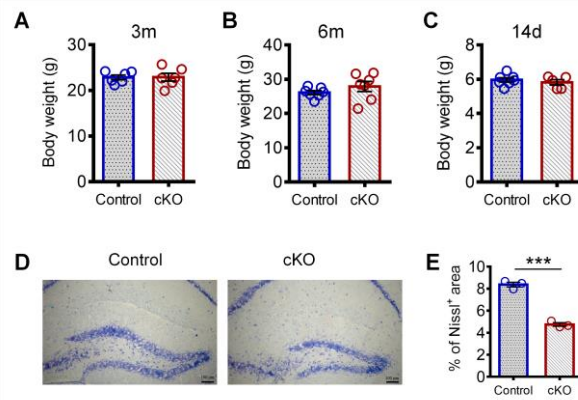

**Figure S2. Body weights and the Nissl staining results of the *Hamp<sup>GFAP</sup>* cKO and control mice.** **A-C** The body weights of 3-month-old (**A**,  $n = 6$ ), 6-month-old (**B**,  $n = 7$ ), and 14-day-old (**C**,  $n = 7$  and 5) *Hamp<sup>GFAP</sup>* cKO and control mice were determined. **D-E** Representative Nissl staining images (**D**) and quantification (**E**) in the 3-month-old *Hamp<sup>GFAP</sup>* cKO and control mice ( $n = 3$ ). Data were expressed as mean  $\pm$  SEM. \*\*\* $p < 0.001$ .

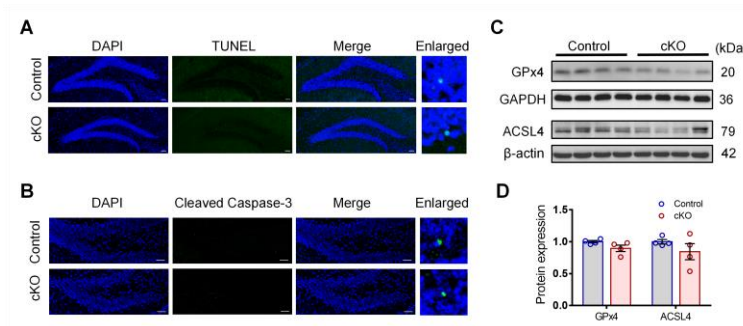

**Figure S3. Detection of apoptosis and ferroptosis levels in the hippocampus of *Hamp<sup>GFAP</sup>* cKO and control mice.** A-B TUNEL staining (A) and cleaved Caspase-3 immunostaining (B) for detecting apoptotic cells in the hippocampal DG of 3-month-old *Hamp<sup>GFAP</sup>* cKO and control mice (scale bar: 50  $\mu$ m). C-D Western blot images (C) and quantification (D) of GPx4 and ACSL4 expression levels in the hippocampus of 3-month-old *Hamp<sup>GFAP</sup>* cKO and control mice ( $n = 4$  per group, GAPDH and  $\beta$ -actin as the internal reference). Data were expressed as mean  $\pm$  SEM.

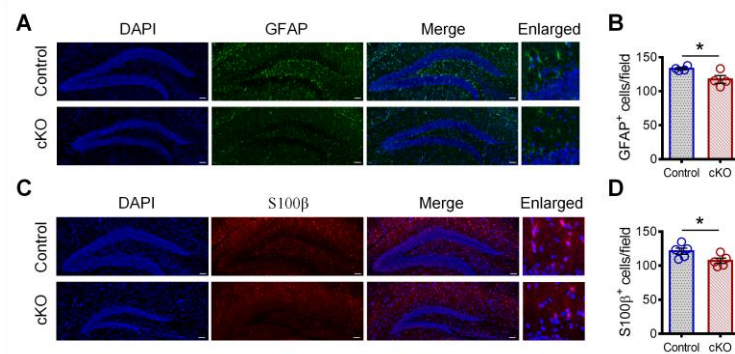

**Figure S4. Immunostaining for astrocytes in the hippocampus of *Hamp<sup>GFAP</sup>* cKO and control mice.** A-B Representative immunostaining images for GFAP (A) and quantification (B) in the hippocampal DG of 3-month-old *Hamp<sup>GFAP</sup>* cKO and control mice (scale bar: 50  $\mu$ m,  $n = 4$  per group). C-D Representative immunostaining images for S100 $\beta$  (C) and quantification (D) in the hippocampal DG of 14-day-old *Hamp<sup>GFAP</sup>* cKO and control mice (scale bar: 50  $\mu$ m,  $n = 5$  per group). Data were expressed as mean  $\pm$  SEM. \* $p < 0.05$ .

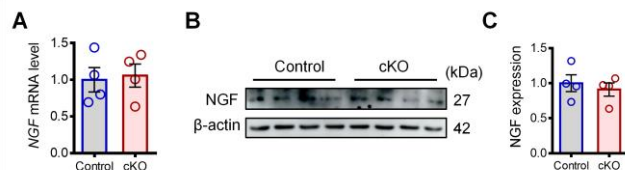

**Figure S5. Detection of *NGF* mRNA and protein levels in the hippocampus of *Hamp<sup>GFAP</sup>* cKO and control mice.** A qRT-PCR results of *NGF* expression in the hippocampus of 3-month-old *Hamp<sup>GFAP</sup>* cKO and control mice ( $n = 4$  per group). B-C Western blot images (B) and quantification (C) of *NGF* expression levels in the hippocampus of 3-month-old *Hamp<sup>GFAP</sup>* cKO and control mice ( $n = 4$  per group;  $\beta$ -actin as the internal reference). Data were expressed as mean  $\pm$  SEM.
